# Supplementary material
Source: publisher figshare collection journal article supplement (https://gsapubs.figshare.com/ndownloader/files/35999726)
Supplement: Supplementary file 1 [file 35999726]

## Sheet: Sheet1
Table S2. U-Pb baddeleyite geochronology results of Yongli carbonatite sample NGJ.
	Pb	232Th	238U	207Pb/206Pb	207Pb/206Pb	207Pb/235U	207Pb/235U	206Pb/238U	206Pb/238U	207Pb/206Pb	207Pb/206Pb	207Pb/235U	207Pb/235U	206Pb/238U	206Pb/238U	208Pb/232Th	208Pb/232Th
	ppm	ppm	ppm	Ratio	1sigma	Ratio	1sigma	Ratio	1sigma	Age (Ma)	1sigma	Age (Ma)	1sigma	Age (Ma)	1sigma	Age (Ma)	1sigma
NGJ001-1	46178.2	196.871	130679	0.112454	0.00168346	5.11226	0.255604	0.329506	0.0160731	1839.2	26.7	1838.14	42.4864	1835.99	77.9378	2173.2	725.456
NGJ001-2	13559.9	269.683	36768.9	0.113967	0.00122888	5.2402	0.276336	0.333201	0.017051	1864.82	19.5975	1859.18	44.9938	1853.88	82.4509	1816.82	527.445
NGJ001-3	15761.4	75.8706	42578	0.113169	0.00158744	5.34103	0.361554	0.34184	0.0195555	1850.93	25.315	1875.45	57.9582	1895.52	93.9542	1731.75	956.862
NGJ001-4	317810	752.369	878029	0.118444	0.00124979	5.44328	0.22833	0.333031	0.0135428	1933.03	18.8325	1891.7	35.9972	1853.06	65.4938	1759.7	173.425
NGJ001-5	12605.5	206.488	33195.7	0.115508	0.00232157	5.43685	0.234257	0.341488	0.0203254	1887.96	36.5725	1890.68	36.9692	1893.82	97.6795	1742.37	288.066
NGJ001-6	22886.7	105.612	64952.8	0.114136	0.00176494	5.14636	0.214818	0.326989	0.0170472	1866.36	27.7775	1843.79	35.5025	1823.77	82.8187	676.74	0
NGJ001-7	38211.2	296.596	102141	0.113856	0.00127623	5.13534	0.209312	0.326942	0.0138628	1862.04	20.37	1841.97	34.654	1823.54	67.3492	6925.49	1187.68
NGJ001-8	31262.4	212.192	88312.8	0.114414	0.00214145	5.11453	0.107323	0.324438	0.0103567	1872.22	34.4125	1838.52	17.824	1811.36	50.41	2015.61	608.008
NGJ001-9	92821.1	361.851	251984	0.114925	0.00152056	5.37385	0.322097	0.33907	0.0210806	1879.63	23.7625	1880.7	51.3553	1882.19	101.493	2012.33	384.381
NGJ001-10	18194.5	398.887	48517.6	0.117648	0.00355259	5.36398	0.0977185	0.33105	0.00819081	1920.68	54.0125	1879.12	15.5924	1843.47	39.6695	1484.57	265.973
NGJ001-11	88274.8	433.22	233392	0.117702	0.00239617	5.58541	0.224846	0.344825	0.0176144	1921.91	36.42	1913.85	34.6817	1909.84	84.4396	2098.18	341.747
NGJ001-12	15221.1	230.274	40805.2	0.116576	0.00155436	5.3936	0.276981	0.335332	0.0170748	1905.56	24.075	1883.84	44.0156	1864.17	82.4343	2314.36	346.195
NGJ001-13	38460.7	331.116	108824	0.114783	0.001811	5.08531	0.383863	0.321018	0.0233908	1876.24	28.8575	1833.66	64.1357	1794.7	114.156	1328.69	185.968
NGJ001-14	45552.9	172.45	125200	0.11405	0.00131102	5.2589	0.23924	0.334063	0.0136333	1865.13	21.45	1862.22	38.8309	1858.05	65.8806	3028.74	504.925
NGJ001-15	62486	113.21	171375	0.112948	0.00149463	5.27128	0.0883012	0.338203	0.00715464	1847.22	19.445	1864.22	14.2978	1878.02	34.4658	1413.65	101.016
NGJ001-16	46145.2	343.857	135767	0.114523	0.00317979	4.82228	0.141342	0.305486	0.0161294	1872.53	50.3075	1788.79	24.6543	1718.46	79.6502	4562.78	370.153
NGJ001-17	47142.2	1212.33	125792	0.114315	0.00279228	5.24951	0.225041	0.332593	0.0111495	1868.83	48.9225	1860.69	36.5791	1850.94	53.9367	2149.26	243.872
NGJ001-18	36879.9	117.806	98468.1	0.116791	0.00243921	5.54009	0.33557	0.343415	0.0150186	1909.26	38.4275	1906.84	52.1448	1903.08	72.0701	2938.59	229.093
NGJ001-19	47849.4	240.945	130508	0.115261	0.00190471	5.37881	0.339698	0.338292	0.0242467	1884.26	29.625	1881.49	54.1246	1878.45	116.807	1197.53	750.706
